# Supplementary material for: Lupus Autoimmunity and Metabolic Parameters Are Exacerbated Upon High Fat Diet-Induced Obesity Due to TLR7 Signaling
Source: Front Immunol. 2019 Sep 4;10:2015. doi: 10.3389/fimmu.2019.02015 (PMC6738575; doi:10.3389/fimmu.2019.02015)
Supplement: Supplementary file 2 [file Table_2.docx]

**Table S2.** Liver weight, total cell counts and major cell populations of WT and TLR8ko mice upon SD or HFD.

| Type of diet | | Standard diet (SD) | | High fat diet (HFD) | |
| --- | --- | --- | --- | --- | --- |
| Genotype | | WT  (n=6) | TLR8ko (n=6) | WT  (n=6) | TLR8ko (n=4) |
| Body weight (g) | | 26.6 ± 1.1 | 24.2 ± 1.8 | 35.1 ± 3.2 | 30.9 ± 2.3 |
| Liver weight (g) | | 1.2 ± 0.3 | 0.9 ± 0.1 | 1.1 ± 0.1 | 1.1 ± 0.1‡ |
| Total cell count (x104) |  | 195.3 ± 76 | 134.4 ± 40.7 | 126.3 ± 20 | 166.8 ± 51.4 |
| Cell type | Surface markers |  |  |  |  |
| CD3+ cells | CD3+ | 45.8 ± 3.4 | 47 ± 4.5 | 46 ± 3.5 | 46.5 ± 5.5 |
| (88.9 ± 34.4) | (63.3 ± 21) | (58 ± 9.5) | (77.7 ± 24.5) |
| CD4 T cells | CD3+CD4+ | 19.5 ± 1.6 | 20.1 ± 2.9 | 18.3 ± 1.7 | 14.4 ± 4.3 |
| (37.3 ± 12.7) | (27.7 ± 10.8) | (23 ± 4.1) | (23.8 ± 9.1) |
| CD8 T cells | CD3+CD8+ | 15.5 ± 3.5 | 15.1 ± 3.1 | 10.3 ± 2 | 13.8 ± 4.4 |
| (30.4 ± 13.2) | (21 ± 6.5) | (13 ± 2.8†) | (22.6 ± 8.7) |
| NK cells | NK1.1+CD3- | 6.4 ± 0.7 | 6 ± 1.8 | 7.1 ± 0.6 | 7 ± 1.9 |
| (12.4 ± 5) | (6.8 ± 2) | (9 ± 1.4) | (12.1 ± 6.1) |
| B cells | CD45.2+B220+ | 23.2 ± 3.5 | 30.4 ± 7.6 | 28.4 ± 7.4 | 20.3 ± 7.8 |
| (45.1 ± 18.2) | (43.9 ± 18) | (35.8 ± 10.7) | (31.5 ± 10.2) |
| CD11c+ cells | CD45.2+CD11c+ | 14.4 ± 1.1 | 17.5 ± 5.9 | 15.4 ± 3 | 30.9 ± 12.3*‡ |
| (28.1 ± 10.9) | (20.5 ± 7.3) | (19.8 ± 6.3) | (54.1 ± 36.1*‡) |
| cDC | CD45.2+CD11chiMHCIIhi CD64- | 1.3 ± 0.1 | 1.5 ± 1 | 1.7 ± 0.4 | 1.4 ± 0.2 |
| (2.5 ± 0.9) | (1.5 ± 0.6) | (2.1 ± 0.6) | (2.4 ± 1) |
| pDC | CD45.2+B220+SiglecH+ | 1.3 ± 0.6 | 1.1 ± 0.6 | 1 ± 0.3 | 1 ± 0.5 |
| (2.5 ± 1.6) | (1.3 ± 0.7) | (1.3 ± 0.5) | (1.8 ± 1.4) |
| Neutrophils | CD45.2+Ly6G+CD11b+ | 1.2 ± 0.6 | 1.1 ± 0.9 | 0.9 ± 0.5 | 0.9 ± 0.5 |
| (2.5 ± 1.5) | (1.5 ± 1.4) | (1.1 ± 0.6) | (1.5 ± 1) |

Data are from 8 months old female mice (n=4-7 per group). Values correspond to the percentage on live lymphocytes for T and NK cells and on live cells for the rest of the cells and shown as average ± SD. In parenthesis, absolute number of cells (x104) are indicated. Data of TLR8ko mice and their WT controls upon SD or HFD are representative of two independent experiments. Statistical analysis was done using Kruskal-Wallis test followed by Mann-Whitney tests. P-values were corrected with the Benjamini and Hochberg method. * P < 0.05 versus corresponding WT, † P < 0.05 versus WT upon SD, ‡ P < 0.05 versus TLR8ko upon SD.
